# Supplementary material for: Canonical correlation analysis for RNA-seq co-expression networks
Source: PubMed Central journal article supplement — Nucleic Acids Res. 2013 Mar 4;41(8):e95. doi: 10.1093/nar/gkt145 (PMC3632131; doi:10.1093/nar/gkt145), 2013-03-04
Supplement: supp_gkt145_nar-03170-met-n-2012-File009.pdf [file supp_gkt145_nar-03170-met-n-2012-File009.pdf]

Supplemental Table 1. Topology property of Co-expression networks generated by CCA, GLASSO, Random and KEGG in UCEC

| Method | Assortativity |                    | Centralization |                    |
|--------|---------------|--------------------|----------------|--------------------|
|        | Mean          | Standard Deviation | Mean           | Standard Deviation |
| CCA    | -0.2030       | 0.1024             | 0.7534         | 0.0116             |
| GLASSO | -0.0346       | 0.1020             | 0.5871         | 0.0544             |
| Random | -0.0595       | 0.0109             | 0.5921         | 0.0031             |
| KEGG   | -0.4355       |                    | 0.7257         |                    |

Supplemental Table 2. Topology property of Co-expression networks generated by CCA and GLASSO with position-level and gene-level data in Glutamatergic synapse pathway

| Methods | Tissues       | Assortativity | Centralization |
|---------|---------------|---------------|----------------|
| CCA     | Bipolar       | -0.66823575   | 0.78206554     |
|         | Schizophrenia | -0.61958925   | 0.85395689     |
|         | Normal        | -0.57458829   | 0.83041518     |
| GLASSO  | Bipolar       | 0.01021008    | 0.76448247     |
|         | Schizophrenia | 0.05301971    | 0.75174821     |
|         | Normal        | -0.08047029   | 0.74837798     |
| Random  |               | -0.02759387   | 0.7233384      |

## Supplemental Table 3 P-value for testing differential expression of specific alleles

Table S3. P-value for testing differential expression of specific alleles

| Gene           | Chr         | hg18_pos       | hg19_pos         | dbsnp                        | P-values      |               |               |               | Function                             | Associated Disease                             |
|----------------|-------------|----------------|------------------|------------------------------|---------------|---------------|---------------|---------------|--------------------------------------|------------------------------------------------|
|                |             |                |                  |                              | Schizophrenia |               | Bipolar       |               |                                      |                                                |
|                |             |                |                  |                              | Major         | Minor         | Major         | Minor         |                                      |                                                |
| PSEN1          | chr14       | 72674749       |                  | -                            | 0.1333        | <b>0.0388</b> | <b>0.0414</b> | <b>0.0406</b> |                                      |                                                |
| PSEN1          | chr14       | 72675292       |                  | -                            | <b>0.0268</b> | <b>0.0230</b> | 0.1376        | 0.0903        |                                      |                                                |
| PSEN1          | chr14       | 72675376       |                  | -                            | <b>0.0344</b> | 0.4528        | 0.0594        | <b>0.0354</b> |                                      |                                                |
| PSEN1          | chr14       | 72675654       |                  | -                            | 0.4435        | <b>0.0406</b> | 0.2586        | <b>0.0473</b> |                                      |                                                |
| PSEN1          | chr14       | 72687408       |                  | -                            | 0.1549        | 0.0788        | 0.1192        | 0.1242        |                                      |                                                |
| PSEN1          | chr14       | 72719852       |                  | -                            | <b>0.0275</b> | <b>0.0361</b> | 0.0983        | <b>0.0258</b> |                                      |                                                |
| PSEN1          | chr14       | 72720113       |                  | -                            | 0.6507        | <b>0.0113</b> | 0.0915        | 0.0517        |                                      |                                                |
| PSEN1          | chr14       | 72741870       |                  | -                            | 0.2620        | 0.0835        | <b>0.0454</b> | <b>0.0296</b> |                                      |                                                |
| PSEN1          | chr14       | 72756063       | 73686310         | rs362384                     | 0.2090        | 0.3571        | 0.8719        | 0.0990        | <b>*nonsyn<sup>1</sup></b>           | Alzheimer's Disease                            |
| PPP3R1         | chr2        | 68235048       |                  | -                            | <b>0.0490</b> | 0.4060        | 0.0659        | 0.1166        |                                      |                                                |
| PPP3R1         | chr2        | 68235099       |                  | -                            | 0.1343        | <b>0.0461</b> | <b>0.0318</b> | <b>0.0189</b> |                                      |                                                |
| PPP3R1         | chr2        | 68259869       |                  | -                            | 0.6914        | 0.9007        | <b>0.0166</b> | <b>0.0021</b> |                                      |                                                |
| PPP3R1         | chr2        | 68260165       |                  | -                            | 0.9268        | 0.3556        | <b>0.0063</b> | 0.5822        |                                      |                                                |
| PPP3R1         | chr2        | 68260297       |                  | -                            | 0.2712        | 0.9511        | NA            | <b>0.0066</b> |                                      |                                                |
| PPP3R1         | chr2        | 68260787       |                  | -                            | 0.7151        | 0.7362        | 0.3583        | <b>0.0027</b> |                                      |                                                |
| PPP3R1         | chr2        | 68261162       |                  | -                            | 0.8777        | 0.9597        | <b>0.0206</b> | <b>0.0075</b> |                                      |                                                |
| PPP3R1         | chr2        | 68261430       | 68407926         | rs875                        | 0.5513        | 0.9643        | <b>0.0148</b> | 0.0968        |                                      |                                                |
| <i>PPP3R1</i>  | <i>chr2</i> | <i>6.8E+07</i> | <i>68409037</i>  | <i><sup>6</sup>rs1868402</i> | ----          | ----          | ----          | ----          |                                      | <i>Alzheimer's disease</i>                     |
| PPP3R1         | chr2        | 68269271       | 68415767         | <b>rs11692815</b>            | 0.7297        | 0.8015        | <b>0.0283</b> | <b>0.0377</b> | <b>*nonsyn:stop-gain<sup>1</sup></b> |                                                |
| PPP3R1         | chr2        | 68283567       |                  | -                            | 0.1833        | 0.1012        | 0.4540        | <b>0.0444</b> |                                      |                                                |
| PPP3R1         | chr2        | 68283577       |                  | -                            | 0.1272        | 0.2011        | 0.7265        | <b>0.0201</b> |                                      |                                                |
| PPP3R1         | chr2        | 68289733       |                  | -                            | 0.1055        | <b>0.0232</b> | <b>0.0365</b> | 0.1019        |                                      |                                                |
| AXIN1          | chr16       | 276661         | 336660           | rs11647490                   | 0.7000        | <b>0.0196</b> | <b>0.0097</b> | 0.8629        | <b>*nonsyn<sup>1</sup></b>           |                                                |
| AXIN1          | chr16       | 276692         |                  | -                            | 0.3487        | 0.1757        | 0.3269        | 0.0835        |                                      |                                                |
| AXIN1          | chr16       | 276917         | 336916           | rs1048786                    | 0.6683        | 0.3171        | 0.0606        | 0.0790        | <b>*nonsyn<sup>1,2</sup></b>         |                                                |
| AXIN1          | chr16       | 277128         |                  | -                            | 0.2707        | 0.5653        | 0.0995        | <b>0.0157</b> |                                      |                                                |
| AXIN1          | chr16       | 291164         |                  | -                            | 0.0644        | <b>0.0420</b> | <b>0.0289</b> | <b>0.0467</b> |                                      |                                                |
| AXIN1          | chr16       | 295611         |                  | -                            | <b>0.0434</b> | 0.5367        | 0.1015        | 0.3354        |                                      |                                                |
| AXIN1          | chr16       | 313300         |                  | -                            | <b>0.0086</b> | <b>0.0269</b> | 0.1116        | 0.2810        |                                      |                                                |
| TBL1XR1        | chr3        | 1.78E+08       | 176738798        | rs6983                       | 0.5372        | 0.4510        | 0.0901        | 0.2691        |                                      |                                                |
| TBL1XR1        | chr3        | 1.78E+08       | 176739388        | rs3188954                    | 0.9245        | 0.5504        | <b>0.0243</b> | 0.9914        |                                      |                                                |
| TBL1XR1        | chr3        | 1.78E+08       | 176739404        | rs3188952                    | 0.9056        | 0.1264        | <b>0.0202</b> | 0.8172        | <b>nonsyn<sup>1</sup></b>            |                                                |
| TBL1XR1        | chr3        | 1.78E+08       | 176739663        | rs1130272                    | 0.5568        | 0.2734        | <b>0.0334</b> | 0.1158        | <b>nonsyn<sup>1</sup></b>            |                                                |
| TBL1XR1        | chr3        | 1.78E+08       | 176739694        | rs73881945                   | 0.2695        | 0.9989        | 0.4204        | <b>0.0071</b> |                                      |                                                |
| TBL1XR1        | chr3        | 1.78E+08       |                  | -                            | 0.2156        | <b>0.0496</b> | <b>0.0134</b> | <b>0.0166</b> |                                      |                                                |
| <i>TBL1XR1</i> | <i>chr3</i> | <i>1.8E+08</i> | <i>176828751</i> | <i><sup>6</sup>rs1564764</i> | ----          | ----          | ----          | ----          |                                      | <i>schizophrenia(P&lt;0.02247)<sup>5</sup></i> |
| TBL1XR1        | chr3        | 1.78E+08       |                  | -                            | <b>0.0431</b> | 0.3572        | 0.2620        | 0.2971        |                                      |                                                |

|         |      |          |           |                   |               |               |               |               |                                                                 |                                     |
|---------|------|----------|-----------|-------------------|---------------|---------------|---------------|---------------|-----------------------------------------------------------------|-------------------------------------|
| TBL1XR1 | chr3 | 1.78E+08 | 176889360 | rs12485447        | 0.3131        | <b>0.0080</b> | 0.1863        | 0.2507        |                                                                 |                                     |
| CCND3   | chr6 | 42010985 | 41903007  | <b>rs9529</b>     | 0.1552        | 0.8015        | 0.1076        | 0.1765        | <b>*nonsyn<sup>1</sup>;exonic splicing enhancer<sup>3</sup></b> | Alzheimer's disease                 |
| CCND3   | chr6 | 42011718 | -         | -                 | 0.4127        | 0.2174        | <b>0.0156</b> | <b>0.0150</b> |                                                                 |                                     |
| RAC1    | chr7 | 6403328  | -         | -                 | <b>0.0305</b> | 0.1779        | <b>0.0389</b> | <b>0.0121</b> |                                                                 |                                     |
| RAC1    | chr7 | 6408668  | 6442143   | rs2303366         | 0.3358        | 0.7679        | 0.2053        | 0.1766        | <b>nonsyn<sup>1</sup></b>                                       |                                     |
| RAC1    | chr7 | 6408681  | 6442156   | rs2303367         | 0.3146        | 0.6075        | 0.1618        | 0.1252        | <b>nonsyn<sup>1</sup></b>                                       |                                     |
| RAC1    | chr7 | 6408706  | -         | -                 | 0.1068        | 0.3115        | <b>0.0388</b> | 0.3115        |                                                                 |                                     |
| RAC1    | chr7 | 6408896  | 6442371   | rs9374            | 0.3847        | 0.4918        | 0.4126        | <b>0.0160</b> | <b>nonsyn<sup>1</sup></b>                                       |                                     |
| RAC1    | chr7 | 6408958  | 6442433   | rs12977           | 0.3579        | 0.4513        | <b>0.0141</b> | 0.2538        |                                                                 |                                     |
| RAC1    | chr7 | 6409188  | -         | -                 | 0.3832        | 0.3253        | <b>0.0135</b> | 0.3273        |                                                                 |                                     |
| RAC1    | chr7 | 6410046  | -         | -                 | 0.3308        | 0.3606        | 0.3269        | <b>0.0340</b> |                                                                 |                                     |
| SFRP4   | chr7 | 37955114 | 37988589  | rs2044831         | 0.8671        | 0.9812        | 0.1750        | <b>0.0202</b> |                                                                 |                                     |
| SFRP4   | chr7 | 37956747 | 37990222  | rs3734953         | 0.3640        | 0.8574        | 0.1181        | <b>0.0290</b> |                                                                 |                                     |
| SFRP4   | chr7 | 37956998 | 37990473  | rs2598094         | 0.7252        | 0.3785        | <b>0.0049</b> | 0.4994        |                                                                 |                                     |
| SFRP4   | chr7 | 37957000 | 37990475  | rs59667102        | 0.1111        | 0.2906        | 0.2054        | <b>0.0083</b> |                                                                 |                                     |
| SFRP4   | chr7 | 37957022 | 37990497  | rs58224136        | 0.1006        | 0.4330        | 0.2671        | <b>0.0093</b> |                                                                 |                                     |
| SFRP4   | chr7 | 37957442 | 37990917  | rs2722278         | 0.3167        | 0.6016        | 0.8567        | <b>0.0152</b> |                                                                 |                                     |
| SFRP4   | chr7 | 37957654 | 37991129  | rs2722279         | 0.8286        | 0.7257        | <b>0.0472</b> | 0.9330        | <b>nonsyn<sup>1</sup></b>                                       |                                     |
| SFRP4   | chr7 | 37957711 | 37991186  | rs1047785         | 0.4503        | 0.1068        | 0.3217        | <b>0.0147</b> |                                                                 |                                     |
| SFRP4   | chr7 | 37957779 | 37991254  | rs1047800         | 0.0874        | 0.1132        | 0.4371        | <b>0.0187</b> | <b>nonsyn<sup>1</sup></b>                                       |                                     |
| SFRP4   | chr7 | 37957780 | 37991255  | rs1047812         | 0.0860        | 0.1254        | 0.4395        | <b>0.0150</b> | <b>nonsyn<sup>1</sup></b>                                       |                                     |
| CAMK2B  | chr7 | 44223586 | -         | -                 | 0.1365        | 0.4924        | <b>0.0441</b> | <b>0.0238</b> |                                                                 |                                     |
| CAMK2B  | chr7 | 44224249 | -         | -                 | 0.4108        | 0.6855        | 0.2991        | <b>0.0113</b> |                                                                 |                                     |
| CAMK2B  | chr7 | 44224265 | -         | -                 | 0.6401        | 0.6637        | <b>0.0103</b> | <b>0.0038</b> |                                                                 |                                     |
| CAMK2B  | chr7 | 44224663 | -         | -                 | 0.3355        | 0.7756        | 0.3269        | <b>0.0080</b> |                                                                 |                                     |
| CAMK2B  | chr7 | 44225252 | -         | -                 | 0.3391        | 0.3372        | 0.1613        | <b>0.0181</b> |                                                                 |                                     |
| CAMK2B  | chr7 | 44225407 | -         | -                 | 0.2311        | 0.4715        | <b>0.0368</b> | 0.0634        |                                                                 |                                     |
| CAMK2B  | chr7 | 44225468 | -         | -                 | 0.1443        | 0.2258        | <b>0.0422</b> | 0.0926        |                                                                 |                                     |
| CAMK2B  | chr7 | 44225489 | 44258964  | rs13229610        | 0.8457        | <b>0.0086</b> | <b>0.0122</b> | 0.3049        |                                                                 |                                     |
| CAMK2B  | chr7 | 44225585 | -         | -                 | 0.2529        | 0.1747        | 0.3508        | <b>0.0226</b> |                                                                 |                                     |
| CAMK2B  | chr7 | 44226231 | 44259706  | rs1065359         | 0.1064        | 0.9904        | 0.7414        | <b>0.0147</b> | <b><sup>4</sup>CpG: 25</b>                                      |                                     |
| CAMK2B  | chr7 | 44226396 | 44259871  | rs1127065         | 0.9711        | 0.1800        | <b>0.0292</b> | 0.5598        | <b><sup>4</sup>CpG: 25</b>                                      | weight gain                         |
| CAMK2B  | chr7 | 44249393 | 44282868  | rs11542228        | 0.3403        | 0.4425        | 0.1167        | <b>0.0383</b> |                                                                 | bipolar (P < 0.009138) <sup>5</sup> |
| CAMK2B  | chr7 | 44249402 | 44282877  | <b>rs11542227</b> | 0.8915        | 0.9966        | <b>0.0241</b> | 0.0697        | <b>exonic splicing enhancer<sup>3</sup></b>                     |                                     |

1: H-Inv database v 7.0; \* the reference protein is found

incomplete

2: NCBI

3: GeneCard

4: SNP nexus database

5: association tested in our study

6: (*italic*) imputed SNP which was not represented in the ASE

Supplemental Figure 1 The simulation results of comparison of our CCA method and GLASSO. The x-axis represented the size of network (number of nodes) and the y-axis denoted the accuracy of the method (Proportion of edges are retained in the reconstructed co-expression network by 1000 resampling) .



**Supplementary Figure 2.** The shared network structure by Endometrioid Carcinoma Pathway in KEGG and reconstructed co-expression networks using the CCA and GALSSO methods using Uterine Corpus Endometrioid Carcinoma samples in TCGA dataset.





Supplemental Figure 4. The co-expression network reconstructed by GLASSO

method using overall gene expression data of bipolar tissue samples.



Supplemental Figure 5. The co-expression network reconstructed by GLASSO

method using overall gene expression data of normal tissue samples.



**Supplementary Figure 6.** The co-expression network reconstructed by CCA method using position-level RNA-seq data in Glutamatergic synapse pathway of bipolar tissue samples. Nodes are sized, numbered and colored by their degree value.



**Supplementary Figure 7.** The co-expression network reconstructed by CCA method using position-level RNA-seq data in Glutamatergic synapse pathway of schizophrenia tissue samples. Nodes are sized, numbered and colored by their degree value.





**Supplementary Figure 9.** The co-expression network reconstructed by GLASSO method using position-level RNA-seq data in Glutamatergic synapse pathway of bipolar tissue samples. Nodes are sized, numbered and colored by their degree value.
